1 **Multiple effects of TNF $\alpha$  inhibitors on the development of the adaptive immune response**  
2 **after SARS-CoV-2 vaccination**

3  
4 Ulf Martin Geisen<sup>1\*</sup>, Ruben Rose<sup>2\*</sup>, Franziska Neumann<sup>3</sup>, Maria Ciripoi<sup>1</sup>, Lena Vullriede<sup>1</sup>,  
5 Hayley M Reid<sup>1</sup>, Dennis Kristopher Berner<sup>1</sup>, Federico Bertoglio<sup>4</sup>, Paula Hoff<sup>5</sup>, Michael Hust<sup>4</sup>,  
6 Ann Carolin Longardt, Thomas Lorentz<sup>3</sup>, Gabriela Rios Martini<sup>7,9</sup>, Carina Saggau<sup>7</sup>, Jan Henrik  
7 Schirmer<sup>1</sup>, Maren Schubert<sup>4</sup>, Melike Sümbül<sup>9</sup>, Florian Tran<sup>8,10</sup>, Mathias Voß<sup>2</sup>, Rainald  
8 Zeuner<sup>1</sup>, Peter J Morrison<sup>9</sup>, Petra Bacher<sup>7,8</sup>, Helmut Fickenscher<sup>2</sup>, Sascha Gerdes<sup>9</sup>, Matthias  
9 Peipp<sup>11</sup>, Stefan Schreiber<sup>8,10</sup>, Andi Krumbholz<sup>2,3‡</sup>, Bimba Franziska Hoyer<sup>1‡</sup>

10  
11 1 Medical Department I, Rheumatology and Clinical Immunology, University Medical Center Schleswig-Holstein  
12 Campus Kiel, Kiel, Germany

13 2 Institute for Infection Medicine, Christian-Albrecht University of Kiel and University Medical Center  
14 Schleswig-Holstein, Campus Kiel, Kiel, Germany

15 3 Labor Dr. Krause und Kollegen MVZ GmbH, Kiel, Germany

16 4 Institute of Biochemistry, Biotechnology, and Bioinformatics, Department of Biotechnology, Technische  
17 Universität Braunschweig, Braunschweig, Germany.

18 5 Department of Rheumatology, Endokrinologikum-Gruppe, Berlin, Germany

19 6 Department of Pediatrics, University Medical Center Schleswig-Holstein Campus Kiel, Kiel, Germany

20 7 Institute of Immunology, University Medical Center Schleswig-Holstein Campus Kiel, Kiel, Germany

21 8 Institute of Clinical Molecular Biology, Christian-Albrecht University of Kiel, Kiel, Germany

22 9 Department for Dermatology, University Medical Center Schleswig-Holstein Campus Kiel, Kiel, Germany

23 10 Department for Internal Medicine I, University Medical Center Schleswig-Holstein Campus Kiel

24 11 Division of Antibody-Based Immunotherapy, Department of Internal Medicine II, University Medical Center  
25 Schleswig-Holstein Campus Kiel, Kiel, Germany

26  
27 \* ‡These authors contributed equally

28  
29 **Abstract**

30 *Objectives:*

31 The humoral immune response to SARS-CoV-2 vaccination in patients with chronic  
32 inflammatory disease (CID) declines more rapidly with TNF $\alpha$  inhibition. Furthermore, the  
33 efficacy of current vaccines against Omicron variants of concern (VOC) including BA.2 is  
34 limited. Alterations within immune cell populations, changes in IgG affinity and the ability to  
35 neutralise a pre-VOC strain and the BA.2 virus were investigated in these at-risk patients.

36 *Methods:*

37 Serum levels of anti-SARS-CoV-2 IgG, IgG avidity and neutralising antibodies (NA) were  
38 determined in anti-TNF $\alpha$  patients (n=10) and controls (n=24 healthy individuals; n=12  
39 patients under other disease-modifying anti-rheumatic drugs, oDMARD) before and after the  
40 second and third vaccination by ELISA, immunoblot and live virus neutralisation assay. SARS-  
41 CoV-2-specific B- and T cell subsets were analysed by multicolour flow cytometry.

42 *Results:*

43 IgG avidity and anti-pre-VOC NA titres decreased faster in anti-TNF $\alpha$  recipients than in  
44 controls 6 months after the second vaccination (healthy individuals: avidity: p $\leq$ 0.0001; NA:  
45 p=0.0347; oDMARDs: avidity: p=0.0012; NA: p=0.0293). Total plasma cell counts were  
46 increased in anti-TNF $\alpha$  patients (Healthy individuals: p=0.0344; oDMARDs: p=0.0254),  
47 whereas absolute numbers of SARS-CoV-2-specific cells were comparable 7 days after  
48 vaccination. These patients had lower BA.2 NA titres compared to both other groups, even  
49 after the third vaccination.

50 *Conclusions:*

51 We show a reduced SARS-CoV-2 neutralising capacity in patients under TNF $\alpha$  blockade. In  
52 this cohort, the plasma cell response appears to be less specific and show stronger  
53 bystander activation. While these effects were observable after the first two vaccinations  
54 and with older VOC, the differences in responses to BA.2 were magnified.

55

56 **What is already known on this topic** – Patients with chronic inflammatory diseases treated  
57 with TNF $\alpha$  inhibitors show a greater decrease in SARS-CoV-2 IgG 6 months after the second  
58 vaccination than patients taking oDMARDs and healthy individuals.

59

60 **What this study adds** – Antibodies from patients taking TNF $\alpha$  blockers have a lower SARS-  
61 CoV-2 neutralising capacity and maturity. Plasma cells from these patients exhibit less  
62 specific immune reaction. SARS-CoV-2-specific T cells are less activated. Neutralisation  
63 against BA.2 is drastically reduced even after the third vaccination.

64

65 **How this study might affect research, practice or policy** – This study emphasizes the need  
66 to protect vulnerable groups such as patients using TNF inhibitors. They could benefit from  
67 Omicron-adapted vaccination, but most likely they need to be protected by additional  
68 means other than vaccination.

69

70 **Keywords:** COVID19, Tumor Necrosis Factor Inhibitors, Vaccination, Autoimmune Diseases

71

72 **Word Count: 3091 (max 3500)**

73 **Abstract: 250**

74

## 75 **Introduction**

76 The current SARS-CoV-2 pandemic poses a particular challenge for patients with chronic  
77 inflammatory disease (CID) receiving immunosuppressive therapies. For example, certain  
78 immunosuppressive therapies/pharmaceuticals (e.g., B cell depleting therapies,  
79 antimetabolites such as methotrexate, high-dose corticosteroids) are known to interfere  
80 with SARS-CoV-2 vaccine efficacy.(1) However, long-term data from this population on  
81 immune response to the vaccines are lacking.

82

83 Previously, we found that CID patients under tumour necrosis factor alpha (TNF $\alpha$ ) inhibiting  
84 therapy initially showed a largely normal, albeit slightly delayed, immune response to SARS-  
85 CoV-2 mRNA vaccines which was followed by a rapid decline of anti-spike (S) and virus-  
86 neutralising antibody (NA) levels compared to patients receiving other disease modifying  
87 anti-rheumatic drugs (oDMARDs) and healthy controls.(2) While the difference in anti-S  
88 antibody levels was marginal at day 7 and absent at day 14 after the second vaccination,  
89 these patients had significantly lower anti-S IgG levels six months after vaccination.  
90 Moreover, the neutralising capacity of serum in CID patients treated with TNF $\alpha$  inhibitors  
91 was dramatically reduced at the sixth month after vaccination, as shown by a surrogate  
92 neutralisation assay.(3) This impairment of adaptive immunity during anti-TNF $\alpha$  treatment  
93 has also been confirmed by other research groups, including live virus neutralisation data  
94 using the Delta variant of concern (VOC) as antigen.(4, 5) Compared with healthy controls,  
95 anti-S IgA levels were decreased in CID patients at all time points after vaccination,  
96 suggesting impaired mucosal immunity.(3) It remains unclear what biological mechanisms  
97 lead to this impaired antibody response and whether these differences indicate generally  
98 lower immunity after vaccination compared with controls. The relationship between B cells

99 and T cells during SARS-CoV-2 vaccination is not fully understood, as humoral and T cell  
100 immunity appear to depend on B cell counts before vaccination.(6) In addition, data from  
101 immunocompromised kidney transplant patients show that T cell activity after vaccination  
102 correlates with the magnitude of the antibody response,(7) while high T cell activity has  
103 been observed in B cell depleted patients after immunisation.(8)

104  
105 Sera from vaccinated healthy individuals show only limited neutralisation capacity against  
106 Omicron (B.1.1.529) VOC.(9, 10) This variant, consisting of several sublineages, including  
107 BA.1 and BA.2, is considered a separate serotype that is antigenically distinct from the  
108 original Wuhan strain (designated here as wild-type, wt, or pre-VOC) and other VOCs.(11)  
109 The marked immune escape of BA.1 and BA.2 and the importance of booster vaccination for  
110 the development of NA against both sublineages have recently been demonstrated,(10)  
111 especially the need of mRNA boost immunisations for persons vaccinated with inactivated  
112 viruses.(12)

113  
114 Only limited data are available on the persistence of NA against various SARS-CoV-2 lineages  
115 (including Omicron) in CID patients receiving anti-TNF $\alpha$  therapy after double vaccination.  
116 Virtually no data are available on the development of binding strength (avidity) of vaccine-  
117 induced IgG antibodies, which is considered an expression of their maturity and optimal  
118 epitope binding (13) (14), for this group of patients, nor are there any data on the  
119 development of cellular immunity.

120  
121 The aim of this study is to clarify the influence of immunosuppressive therapy on the  
122 development of adaptive immunity after SARS-CoV-2 vaccination. To this end, the quality  
123 and quantity of SARS-CoV-2-specific B cells, plasmablasts, T cells, and antibodies were  
124 measured at different time points after the second vaccination. We report differential  
125 development of anti-BA.2 NAs after a third dose of vaccine.  
126

## 127 **Methods**

### 128 *Patient recruitment and biosampling*

129 The study was approved by the ethics committee of the Christian-Albrecht University Kiel  
130 (D409/21). There was no patient and public involvement in conducting the study.  
131 Recruitment of patients and repetitive biosampling was performed as previously  
132 described.(2) The SAVE-CID cohort consists of 47 healthcare workers and other risk groups  
133 who received their first SARS-CoV-2 vaccination in January 2021 followed by a second  
134 vaccination 5 or 3 weeks later. Samples taken 7 days after the third vaccination were also  
135 examined in 12 patients. All patients received BNT162b2 (Comirnaty, Pfizer/BioNTech) or  
136 mRNA-1273 (Spikevax, Moderna). Biosampling and data acquisition as well as data on  
137 antibody concentration, surrogate neutralisation data and clinical characterisation of this  
138 cohort has already been published.(2, 3) The patient groups were age and gender matched  
139 resulting in mean ages of 43 (TNF $\alpha$  inhibitor, median: 42.5), 41.25 (Healthy Control, median:  
140 39) and 41.63 (oDMARDs, median: 46).

141

### 142 *Production of SARS-CoV-2 S1 proteins*

143 S1 domain of the S protein(GenBank: MN908947) with different tags were baculovirus-free  
144 produced in High Five cells (Thermo Fisher Scientific) by transient transfection as previously  
145 described.(15, 16) Protein purification was performed depending 1 or 5 mL column on Äkta  
146 go (Cytiva), Äkta Pure (Cytiva), or Profina System (BIO-RAD). HiTrap Fibro Prisma (Cytiva)  
147 was used as resins for Protein A purification (Fc-tagged proteins). For His-tag purification of  
148 insect cell supernatant HisTrapexcel column (Cytiva) was used. All purifications were  
149 performed according to the manufacturer's manual. S1-HIS was further purified by SEC by a  
150 16/600 Superdex 200 kDa pg (Cytiva).

151

### 152 *Isolation of peripheral blood mononuclear cells (PBMC) and Flow Cytometry*

153 PBMCs from EDTA blood were isolated within three hours of blood collection by density  
154 gradient centrifugation (Biocoll, Bio&SELL GmbH, Feucht, Germany). Afterwards,  $4 \times 10^6$   
155 PBMCs were incubated with his-tagged S1 protein (own protein or Euroimmun, Lübeck,  
156 Germany).(9) PBMCs were then stained with pre-mixed antibodies (CD19-PerCP-Vio-700  
157 (REA657, Miltenyi Biotec, Bergisch-Gladbach, Germany), CD20-PE-Cio770 (REA780, Miltenyi  
158 Biotec), CD3-Pacific Blue (OKT3, Biolegend, San Diego, USA), CD14 Pacific Blue (M5E2,  
159 Biolegend), CD27-APC (M-T271, Biolegend), anti-HIS-PE (JO95-G46, Biolegend), Biolegend),  
160 HLA-DR-VioGreen (REA805, Miltenyi Biotec), CD138-BV605 MI15, Biolegend)) and analysed  
161 using a MacsQuant 16 Cytometer (Miltenyi Biotec, Bergisch-Gladbach, Germany). Secondary  
162 staining using AF-700 coupled S1-fc protein were used as gating and staining control to  
163 exclude false positive events (see figure S1 and S2 for more information). For the calculation  
164 of immune cells per blood volume, 50 $\mu$ L of whole blood was stained, (CD3-Pacific Blue  
165 (Biolegend), CD14-FITC (REA599, Miltenyi Biotec), CD4-PE (Vit4, Miltenyi Biotec), CD19-  
166 PerCP-Vio700 and CD45-APC-Vio770 (H130, Biolegend)), lysed, (Red blood lysis, BD) and  
167 measured on a MACSQuant 16 (Miltenyi Biotec). The cell counts per 50 $\mu$ L blood for each  
168 sample were used to calculate all other cell counts from the PBMC staining. Staining and  
169 measurement were performed in PBS containing 1% BSA, 0.5% EDTA and 0.1% sodium azide.

170

### 171 *Measurement of Antibody Secreting Cells by Three-Colour Fluorospot*

172 PBMCs were isolated as described above and different T cell numbers were incubated for  
173 three hours in a 96-well 0.45 $\mu$ M PVDF Immobilon-FL membrane plate (Merck Millipore,  
174 Burlington, MS, USA) which was pre-coated with SARS-CoV-2 protein or FAB2-fragments

175 against Immunoglobulins A, M (both Southern Biotech, Birmingham, USA), G (Jackson  
176 Immunoresearch, Cambridge, UK) and blocked with 15% FCS in PBS. After 3 washing steps  
177 with deionised water, the wells were stained using IgA-FITC, IgG-FC-AF555 and IgM-AF647  
178 (all Southern Biotech). Measurement was performed on a Bioreader 6000Fb equipped with  
179 Eazyreader software (Bio-SYS, Karben, Germany)

180

#### 181 *Antigen-reactive T cell enrichment (ARTE)*

182 The ARTE was performed as previously described (17-20). In brief,  $0.5-1 \times 10^7$  PBMCs were  
183 stimulated for 7 hours with  $0.5 \mu\text{g/peptide/ml}$  SARS-CoV-2 S peptide pool (JPT, Berlin,  
184 Germany) in presence of  $1 \mu\text{g/ml}$  CD40 and  $1 \mu\text{g/ml}$  CD28 pure antibody (both Miltenyi  
185 Biotec, Bergisch Gladbach, Germany).  $1 \mu\text{g/ml}$  Brefeldin A (Sigma Aldrich) was added for the  
186 last two hours. Cells were magnetically isolated using the CD154 MicroBead Kit (Miltenyi  
187 Biotec). After surface staining with CD4-APC-Vio770 (M-T466), CD8-VioGreen (REA734),  
188 CD14-VioGreen (REA599), CD20-VioGreen (LT20) (all Miltenyi Biotec), CD45RA-PE-Cy5  
189 (HI100), PD-1 Brilliant Violet 605 (EH12.2H7), CCR7-Brilliant-Violet-785 (G043H7) (all  
190 BioLegend), cells were fixed, permeabilized and stained intracellular with CD154-FITC  
191 (REA238), IL-21-PE (REA1039) (both Miltenyi Biotec), IFN- $\gamma$ -PerCP-Cy5.5 (4S.B3), TNF $\alpha$ -  
192 Brilliant-Violet-650 (MAb11), IL-10-PE-Dazzle (JES3-9D7) (all BioLegend), IL-2-BV711  
193 (5344.111), Ki-67-Alexa Fluor 700 (B56) (both BD Biosciences). Viability 405/520 Fixable Dye  
194 (Miltenyi Biotec) was used to exclude dead cells. Data were acquired on a LSR Fortessa (BD  
195 Bioscience, San Jose, CA, USA). CD154<sup>+</sup> background cells enriched from the non-stimulated  
196 control were subtracted and frequencies of antigen-specific T cells were determined based  
197 on CD154<sup>+</sup> T cells after enrichment, normalised to the total number of CD4<sup>+</sup> T cells applied  
198 on the column.

199

#### 200 *Binding strength (avidity) of SARS-CoV-2 IgG antibodies*

201 The IgG avidity was assessed with the *recomLine* SARS-CoV-2 IgG assay on a Dynablot Plus  
202 system together with a BLOTrix reader and the recomScan software (all from Mikrogen  
203 GmbH, Neuried, Germany) as reported previously.(21) This immunoblot consists of a  
204 nitrocellulose strip separately carrying recombinant nucleocapsid protein (NP) and the S1-  
205 and RBD-subunits of the S protein. Binding of IgG to these SARS-CoV-2 antigens in presence  
206 or absence of avidity reagent was automatically measured and assigned to four categories:  
207 no avidity detectable (=0), low avidity (=1), intermediate avidity (=2) and high (=3)  
208 avidity.(22)

209

#### 210 *Measurement of neutralising antibodies against a pre-VOC strain and a BA.2 strain*

211 Sera were tested in triplicate using a Vero cell-based live virus neutralisation test (cVNT) in  
212 96-well format under biosafety level 3 conditions, as previously reported.(10, 22) In brief,  
213 sera were diluted 1:10 to 1:1280 in cell culture medium free of fetal calf serum. As antigens  
214 for the cVNT, we used either 50 plaque-forming units per well of a B.1 strain (pre-VOC of  
215 2020) or an Omicron BA.2 strain, which we had previously isolated (23) and characterised by  
216 whole-genome sequencing.(10, 23) After four (pre-VOC) or six (BA.2) days of incubation,  
217 cells were fixed by addition of paraformaldehyde and stained with an aqueous crystal violet  
218 methanol solution. Serum dilutions (titres) > 1:10 that prevented the formation of a  
219 cytopathic effect in  $\geq 2$  wells were considered to contain neutralising antibodies (NA); if no

220 exact titre could be given, the geometric mean of the two adjacent titres was calculated.(10,  
221 22)

222

### 223 *Data analysis and statistics*

224 Flow cytometry data was analysed using FlowJo v10 (BD Bioscience). Statistical analyses and  
225 graphs were prepared using RStudio (version 2022.02.0+443) and Prism 8 (GraphPad  
226 Software, LLC). For analysis of differences between the groups, Kruskal-Wallis Test and non-  
227 parametric pairwise comparisons were performed.

228

## 229 **Results**

230

### 231 **Anti-S-IgG-antibody concentrations, IgG avidity and neutralisation efficacy decrease 6** 232 **months after vaccination**

233 Under TNF $\alpha$  inhibitor therapy, anti-S-IgG levels after the second immunisation were  
234 significantly lower than in patients receiving oDMARDs or in healthy controls (figure 1a).  
235 None of the subjects showed anti-NP IgG reactivity, making infection breakthrough unlikely  
236 (data not shown). The IgG avidity and neutralisation capacity against the pre-VOC strain  
237 were high in all tested groups 14 days after second vaccination (avidity: median avidity index  
238 (MAI) = 3; NA: geometric mean titres (GMT)=1:98–1:234)(figure 1B, C). Six months after  
239 second vaccination, IgG avidity and pre-VOC NA titres significantly decreased in TNF $\alpha$ -  
240 inhibitor treated vaccinees (n=8; avidity: MAI=1.25; NA: GMT=1:2) compared to patients  
241 receiving oDMARDs (n=7; avidity: MAI=3, p=0.0012; NA: GMT=1:38, p=0.0293) and healthy  
242 controls (n=12; avidity: MAI=3, p $\leq$ 0.0001; NA: GMT=1:25, p=0.0347) (figure 1A). Relative to  
243 the pre-VOC strain, anti-BA.2 NA titres were significantly lower than against the pre-VOC  
244 strain in all three groups at day 14 after the second vaccination (GMT=1:2-1:4 vs. GMT=1:98-  
245 1:234; p=0.0001-0.0072) and were not detected after six months (GMT<1:10, figure 1D). At 7  
246 days after the third vaccination, anti-BA.2 NAs were detectable in all subjects except  
247 patients taking a TNF $\alpha$  blocker (n=4 per group; GMT=1:62-1:95 vs. GMT=1:3). At this time  
248 point, IgG avidity was high in all subjects except one patient receiving anti-TNF $\alpha$  treatment.

249

### 250 **Plasma cell populations are altered in patients using TNF $\alpha$ blockers**

251 Patients under TNF $\alpha$  inhibiting therapy showed higher numbers of plasmablasts in the  
252 peripheral blood 7 days after the second vaccination (median: 9.153cells/ $\mu$ L) compared to  
253 patients receiving oDMARDs (median: 2.205cells/ $\mu$ L, p=0.0254) (figure 2A) and healthy  
254 controls (2.657 cells/ $\mu$ L, p=0.0344).

255 When comparing SARS-CoV-2 specific plasma cells at the same timepoint, no differences  
256 between patients on TNF $\alpha$  blockade (median 0.295 cells/ $\mu$ L) and healthy controls (median  
257 0.333 cells/ $\mu$ L) were detected, while patients treated with oDMARDs other than TNF $\alpha$   
258 inhibitors had significantly lower cell numbers compared to healthy controls (median: 0.204  
259 cells/ $\mu$ L; p=0.0015) (figure 2B).

260 Anti-TNF $\alpha$  treated patients generally displayed more peripheral blood IgA plasma cells than  
261 controls and patients receiving oDMARDs (figure 2C). This trend became significant on day  
262 14 after vaccination for patients under oDMARDs (median 0.404 cells/ $\mu$ L) and TNF $\alpha$  blockers  
263 (median 1.818 cells/ $\mu$ L; p=0.0397).

264 With regards to SARS-CoV-2-specific IgA-plasma cells, counts were lower in the anti-TNF $\alpha$   
265 group on day 7 after the second vaccination (median: 0.016 cells/ $\mu$ L) compared to healthy  
266 controls (median: 0.052 cells/ $\mu$ L; p=0.0203) and patients treated with oDMARDs  
267 (median:0.035 cells/ $\mu$ L; p=0.0299) (figure 1D).

268 Overall numbers of mature circulating CD138<sup>+</sup> plasma cells were higher in patients on TNF $\alpha$   
269 blockade (median: 0.101 cells/ $\mu$ L) than in healthy controls (median: 0.031 cells/ $\mu$ L;  
270  $p=0.0055$ ) and patients treated with oDMARDs (median: 0.019 cells/ $\mu$ L;  $p=0.0015$ ) on day 14  
271 after second vaccination (figure 2E). Differences at time points between the first and the  
272 second vaccination were not significant. We were not able to detect differences in the  
273 number of SARS-CoV-2 specific plasma cells. However, on day 7 after second vaccination,  
274 healthy controls had higher numbers of circulating CD138<sup>+</sup> plasma cells in the peripheral  
275 blood (median: 0.004 cells/ $\mu$ L) than patients using TNF $\alpha$  inhibitors (median: 0.002 cells/ $\mu$ L;  
276  $p=0.0055$ ) or receiving oDMARDs (median: 0.001 cells/ $\mu$ L;  $p=0.0026$ ) (figure 2F).

277

### 278 **Anti-TNF $\alpha$ treatment does not change the number of SARS-CoV-2 specific antibody** 279 **secreting cells**

280 Relative to the other two sample groups, anti-TNF $\alpha$  patients showed a pronounced increase  
281 in SARS-CoV-2 specific antibody secreting cells (ASCs) of the IgM isotype at day 7 post  
282 second vaccination, while total numbers of ASC of all other isotypes remained comparable  
283 between groups (figure 3A). Analysing spot size in our Fluorospot assays as a surrogate for  
284 the amount of secreted antibody per cell, both patient groups generally displayed larger  
285 spot sizes suggesting increased antibody secretion per ASC (figure 3B). These differences  
286 were not significant except for IgA ( $p=0.0026$  for TNF vs. Healthy Control and  $p=0.001$  for  
287 oDMARDs vs. Healthy Control). No differences were detected between the two patient  
288 groups. The number of ASCs correlated well with SARS-CoV-2 serum IgG levels and the  
289 number of SARS-CoV-2 positive plasmablasts at the same timepoint (figure 3C-D). No  
290 antigen specific plasma cells were detected in the blood of any participant before the first  
291 vaccination (data not shown).

292

### 293 **SARS-CoV-2 specific T cells show signs of delayed activation**

294 SARS-CoV-2 S-specific CD4<sup>+</sup> T cells could be detected at similar frequencies in all groups  
295 after second vaccination (figure 4A). We also observed no differences in cytokine production  
296 (TNF $\alpha$ , IFN $\gamma$ , IL-2, IL-21 or IL-10) by the S-specific T cells between TNF $\alpha$  patients, oDMARDs  
297 and controls (figure 4B). In contrast, TNF $\alpha$  patients showed significantly lower expression of  
298 PD-1 and a trend towards increased levels of Ki-67, suggesting a delayed or still ongoing  
299 activation of these cells (figure 4C).

300

### 301 **Discussion**

302 To our knowledge, we present the first such comprehensive data on the longitudinal course  
303 of adaptive immunity in CID patients vaccinated against SARS-CoV-2 undergoing TNF $\alpha$   
304 blockade.

305 These patients show an altered immune response after vaccination relative to oDMARD  
306 patients and healthy controls in the absence of breakthrough infections, suggesting that  
307 such individuals should be monitored more closely for loss of SARS-CoV-2 immunity.

308 Most strikingly, anti-TNF $\alpha$  patients exhibited a stronger decrease in IgG avidity and  
309 neutralisation capacity 6 months after vaccination and did not acquire NAs against BA.2 after  
310 a third vaccination. To our knowledge this is the first report concerning the long-term  
311 neutralisation efficacy against BA.2 VOC within this patient population after vaccination.  
312 While the neutralisation efficiency against the initial pre-VOC wt strain was marginally lower  
313 in anti-TNF $\alpha$ -treated patients 14 days after second vaccination compared to the other  
314 groups, this difference was more pronounced against the BA.2 strain where overall low  
315 neutralisation was detected. Six months after second vaccination, BA.2 NAs were not

316 detected in any of the three study groups, suggesting that the S antigen of this VOC is  
317 relevantly different from that of wt and derived VOCs, consistent with recent studies.(10, 24)  
318 The loss of IgG avidity was unexpected as anti-TNF $\alpha$  patients displayed similarly high IgG  
319 avidity as the other groups at day 14 post second vaccination. Conversely, other studies have  
320 shown, that the avidity of anti- SARS-CoV-2 IgG increases during the subsequent months  
321 after vaccination.(13) This decline of avidity several months after the vaccination anti-TNF $\alpha$   
322 patients has not been previously reported.

323 In addition, various changes in the plasmablast compartment of patients were observed in  
324 response to vaccination. Hence, patients using TNF inhibitors had higher numbers of plasma  
325 cells after the first vaccination (d0.2) relative to the two other groups. These differences  
326 increase after the second vaccination, suggesting a stronger immune reaction. The  
327 frequency of SARS-CoV-2 specific plasma cells within this population was decreased in the  
328 patient groups compared to controls. The absolute number of SARS-CoV-2 specific  
329 plasmablasts however was comparable to the other groups, suggesting that the immune  
330 reaction triggered under TNF $\alpha$  therapy is more unspecific.

331  
332 Higher numbers of mature CD138<sup>+</sup> plasmablasts were detected within the non-SARS-CoV2-  
333 specific plasma cells from anti-TNF $\alpha$  patients. These cells are usually found in the bone  
334 marrow.(25) The difference in maturity between S-specific and non-specific plasma cells may  
335 represent a reduced capacity to form long-lived specific plasma cells in anti-TNF $\alpha$  patients.  
336 However, assessment of these cells in the peripheral blood might not reflect their state in  
337 the bone marrow and our measurements after second vaccination may be too early for the  
338 detection of long-lived SARS-CoV-2-specific plasma cells. We also noted that a large  
339 proportion of these CD138<sup>+</sup> plasma cells expressed HLA-DR (Figure S4). These phenotypically  
340 mature (CD138<sup>+</sup>) and antigen presenting plasmablasts (HLA-DR) were also described in  
341 patients with severe COVID19 (26) their function remains unclear.

342  
343 Interestingly, although broadly homogeneous, there were two outliers in our cohort of anti-  
344 TNF $\alpha$  patients. One patient had consistently high antibody concentrations, high IgG avidity  
345 and NAs at 6 months. The other patient had consistently low values for all three parameters.  
346 These outliers show the importance of individual monitoring of patients at risk of reduced  
347 immunity after vaccination.

348  
349 Our data demonstrate that TNF $\alpha$  inhibitors affect the adaptive immune response after SARS-  
350 CoV-2 vaccination. This is reflected in the development of IgG avidity, virus neutralising  
351 capacity, plasma cell and T cell populations. We recommend regular measurement of anti-  
352 SARS-CoV-2 IgG levels and especially NA titres in these patients, as this group may benefit  
353 from early booster vaccination. To our knowledge, current commercial anti-SARS-CoV-2  
354 antibody tests are based on antigens still derived from the wild type. However, if available,  
355 assays adapted to the currently circulating variants should preferably be used. In addition,  
356 the development of variant-specific surrogate neutralisation tests would be desirable, as  
357 these, unlike live virus neutralisation assays, can also be used in routine laboratories. CID  
358 patients on TNF $\alpha$  inhibitor therapy who have no, or low detectable antibody levels should be  
359 particularly protected from COVID-19. Following SARS-CoV-2 infection, these patients might  
360 require close monitoring and early administration of monoclonal antibodies that also cover  
361 currently circulating VOC. In addition, we recommend the use of a vaccine adapted to the  
362 current VOC as soon as it becomes available.

363



364 The mechanisms leading to decreased antibody response during immunosuppressive  
365 treatment need to be further explored to improve vaccine regimens for these high-risk  
366 patients.

367

368

369

370 Contributors

371 Study design: UMG, FT, MP, SS, AK, HF, BFH. Sample collection: DKB,ACL, JHS, MS, FT, RZ, SG.

372 Experiments and data analysis: UMG, RR, FN, MC, LV, HMR, PB, FB, MH, MV, AK, HF and BFH.

373 Tables and figures: UMG, RR and BFH. Data interpretation: UMG, RR, PB, AK, HF and BFH.

374 Writing of the manuscript: UMG, PH, PJM, AK and BFH. Critical proof reading of the  
375 manuscript: all authors.

376

377 Acknowledgement

378

379 We thank Meike Zahnen (UKSH, Rheumatology), Ina Martens (UKSH, Rheumatology), Sina  
380 Müller (Labor Dr. Krause und Kollegen) and Carina Bäumlner (Labor Dr. Krause und Kollegen)  
381 for excellent technical and organisational assistance.

382 We acknowledge the support of the European Union for the ATAC (“antibody therapy  
383 against corona”. Horizon2020 number 101003650) consortium.

384 The authors thank Mikrogen GmbH, Neuried, Germany, for providing free or discounted kits  
385 for IgG avidity detection.

386

387 Funding

388 Cross-funded by Bundesministerium für Bildung und Forschung (Grant GAIN\_01GM1910D),  
389 DIO002/CoVispect research grant from the Land Schleswig-Holstein, the German Network  
390 University Medicine NUM NaFoUniMedCovid19“ (FKZ: 01KX2021), project COVIM and by  
391 the Deutsche Forschungs-Gemeinschaft Cluster of Excellence Precision Medicine in Chronic  
392 Inflammation and Transregio 130. BFH, PH and SS received funding from Pfizer and other  
393 companies.

394

395 Competing Interests

396 None declared

397

398

399

## References

400

401 1. Boekel L, Steenhuis M, Hooijberg F, Besten YR, van Kempen ZLE, Kummer LY, et al.  
402 Antibody development after COVID-19 vaccination in patients with autoimmune diseases in  
403 the Netherlands: a substudy of data from two prospective cohort studies. *Lancet Rheumatol.*  
404 2021;3(11):e778-e88.

405 2. Geisen UM, Berner DK, Tran F, Sümbül M, Vullriede L, Ciripoi M, et al.  
406 Immunogenicity and safety of anti-SARS-CoV-2 mRNA vaccines in patients with chronic  
407 inflammatory conditions and immunosuppressive therapy in a monocentric cohort. *Annals*  
408 *of the rheumatic diseases.* 2021:annrheumdis-2021-220272.

409 3. Geisen UM, Sümbül M, Tran F, Berner DK, Reid HM, Vullriede L, et al. Humoral  
410 protection to SARS-CoV2 declines faster in patients on TNF alpha blocking therapies. *RMD*  
411 *open.* 2021;7(3).

- 412 4. Chen RE, Gorman MJ, Zhu DY, Carreño JM, Yuan D, VanBlargan LA, et al. Reduced  
413 antibody activity against SARS-CoV-2 B.1.617.2 delta virus in serum of mRNA-vaccinated  
414 individuals receiving tumor necrosis factor- $\alpha$  inhibitors. *Med (N Y)*. 2021;2(12):1327-41.e4.
- 415 5. Farroni C, Picchianti-Diamanti A, Aiello A, Nicastrì E, Laganà B, Agrati C, et al. Kinetics  
416 of the B- and T-Cell Immune Responses After 6 Months From SARS-CoV-2 mRNA Vaccination  
417 in Patients With Rheumatoid Arthritis. *Frontiers in immunology*. 2022;13:846753.
- 418 6. Stefanski AL, Rincon-Arevalo H, Schrezenmeier E, Karberg K, Szelinski F, Ritter J, et al.  
419 B Cell Numbers Predict Humoral and Cellular Response Upon SARS-CoV-2 Vaccination  
420 Among Patients Treated With Rituximab. *Arthritis & rheumatology (Hoboken, NJ)*. 2021.
- 421 7. Schrezenmeier E, Rincon-Arevalo H, Stefanski AL, Potekhin A, Straub-Hohenbleicher  
422 H, Choi M, et al. B and T Cell Responses after a Third Dose of SARS-CoV-2 Vaccine in Kidney  
423 Transplant Recipients. *J Am Soc Nephrol*. 2021;32(12):3027-33.
- 424 8. Fabris M, De Marchi G, Domenis R, Caponnetto F, Guella S, Dal Secco C, et al. High T-  
425 cell response rate after COVID-19 vaccination in belimumab and rituximab recipients.  
426 *Journal of autoimmunity*. 2022;129:102827.
- 427 9. Schubert M, Bertoglio F, Steinke S, Heine PA, Ynga-Durand MA, Maass H, et al.  
428 Human serum from SARS-CoV-2-vaccinated and COVID-19 patients shows reduced binding  
429 to the RBD of SARS-CoV-2 Omicron variant. *BMC Med*. 2022;20(1):102.
- 430 10. Rose R, Neumann F, Müller S, Bäumler C, Schäfer M, Schön F, et al. Delta or Omicron  
431 BA.1/2-neutralizing antibody levels and T-cell reactivity after triple-vaccination or infection.  
432 *Allergy*. 2022.
- 433 11. Simon-Loriere E, Schwartz O. Towards SARS-CoV-2 serotypes? *Nature Reviews*  
434 *Microbiology*. 2022;20(4):187-8.
- 435 12. Zuo F, Abolhassani H, Du L, Piralla A, Bertoglio F, de Campos-Mata L, et al.  
436 Heterologous immunization with inactivated vaccine followed by mRNA-booster elicits  
437 strong immunity against SARS-CoV-2 Omicron variant. *Nature communications*.  
438 2022;13(1):2670.
- 439 13. Bauer G. High avidity of vaccine-induced immunoglobulin G against SARS-CoV-2:  
440 potential relevance for protective humoral immunity. *Exploration of Immunology*.  
441 2022;2(2):113-56.
- 442 14. Bauer G. The potential significance of high avidity immunoglobulin G (IgG) for  
443 protective immunity towards SARS-CoV-2. *International Journal of Infectious Diseases*.  
444 2021;106:61-4.
- 445 15. Korn J, Schackermann D, Kirmann T, Bertoglio F, Steinke S, Heisig J, et al. Baculovirus-  
446 free insect cell expression system for high yield antibody and antigen production. *Scientific*  
447 *reports*. 2020;10(1):21393.
- 448 16. Bertoglio F, Meier D, Langreder N, Steinke S, Rand U, Simonelli L, et al. SARS-CoV-2  
449 neutralizing human recombinant antibodies selected from pre-pandemic healthy donors  
450 binding at RBD-ACE2 interface. *Nature communications*. 2021;12(1):1577.
- 451 17. Bacher P, Heinrich F, Stervbo U, Nienen M, Vahldieck M, Iwert C, et al. Regulatory T  
452 Cell Specificity Directs Tolerance versus Allergy against Aeroantigens in Humans. *Cell*.  
453 2016;167(4):1067-78.e16.
- 454 18. Bacher P, Hohnstein T, Beerbaum E, Röcker M, Blango MG, Kaufmann S, et al. Human  
455 Anti-fungal Th17 Immunity and Pathology Rely on Cross-Reactivity against *Candida albicans*.  
456 *Cell*. 2019;176(6):1340-55.e15.
- 457 19. Bacher P, Rosati E, Esser D, Martini GR, Saggau C, Schiminsky E, et al. Low-Avidity  
458 CD4(+) T Cell Responses to SARS-CoV-2 in Unexposed Individuals and Humans with Severe  
459 COVID-19. *Immunity*. 2020;53(6):1258-71.e5.

- 460 20. Bacher P, Schink C, Teutschbein J, Kniemeyer O, Assenmacher M, Brakhage AA, et al.  
461 Antigen-reactive T cell enrichment for direct, high-resolution analysis of the human naive  
462 and memory Th cell repertoire. *Journal of immunology (Baltimore, Md : 1950)*.  
463 2013;190(8):3967-76.
- 464 21. Neumann F, Rose R, Römpke J, Grobe O, Lorentz T, Fickenscher H, et al. Development  
465 of SARS-CoV-2 Specific IgG and Virus-Neutralizing Antibodies after Infection with Variants of  
466 Concern or Vaccination. *Vaccines*. 2021;9(7):700.
- 467 22. Rose R, Neumann F, Grobe O, Lorentz T, Fickenscher H, Krumbholz A. Humoral  
468 immune response after different SARS-CoV-2 vaccination regimens. *BMC Medicine*.  
469 2022;20(1):31.
- 470 23. Strömer A, Rose R, Schäfer M, Schön F, Vollersen A, Lorentz T, et al. Performance of a  
471 Point-of-Care Test for the Rapid Detection of SARS-CoV-2 Antigen. *Microorganisms*.  
472 2021;9(1):58.
- 473 24. Rössler A, Riepler L, Bante D, von Laer D, Kimpel J. SARS-CoV-2 Omicron Variant  
474 Neutralization in Serum from Vaccinated and Convalescent Persons. *N Engl J Med*.  
475 2022;386(7):698-700.
- 476 25. Khodadadi L, Cheng Q, Radbruch A, Hiepe F. The Maintenance of Memory Plasma  
477 Cells. *Frontiers in immunology*. 2019;10:721.
- 478 26. Bernardes JP, Mishra N, Tran F, Bahmer T, Best L, Blase JI, et al. Longitudinal multi-  
479 omics analyses identify responses of megakaryocytes, erythroid cells and plasmablasts as  
480 hallmarks of severe COVID-19 trajectories. *Immunity*.

482

### 483 **Figure legends**

484

485 Figure 1: **A** Patients using TNF $\alpha$  blockers show reduced antibody serum levels, avidity and  
486 neutralisation at different timepoints. Serum IgG antibody against SARS-CoV-2 Spike 1  
487 subunit at different timepoints as single values per patient. Lines indicate the median. **B** IgG  
488 avidity indices of anti-S IgGs of SARS-CoV-2. **C** Neutralising antibodies against the wild-type  
489 (wt) and **D** BA.2 variant of SARS-CoV-2 at 14 days and six months after the second  
490 vaccination. For BA.2 and IgG avidity, a time point 7 days after the third vaccination was  
491 added (n=4 per group); values are given as individual values and median. Statistical  
492 differences: Kruskal-Wallis test with Dunn's post hoc test, significant differences are  
493 indicated as \* $P < 0.05$ , \*\* $P < 0.01$ , \*\*\* $P < 0.001$ , \*\*\*\* $P < 0.0001$

494

495 Figure 2: Patients using TNF $\alpha$  blockers show higher numbers of overall plasmablasts and  
496 SARS-CoV-2 specific plasmablasts 7 days after the second vaccination. **A** Flow cytometry  
497 analysis of B cell subsets at different timepoints after a vaccination against SARS-CoV-2.  
498 Values are shown as cells per microlitre of blood. Boxes and whiskers indicate median and  
499 95%CI. **B** SARS-CoV-2 specific plasmablasts. IgA<sup>+</sup> plasmablasts **C** and SARS-CoV-2 specific **D**  
500 IgA<sup>+</sup> positive plasmablasts. **E** and **F**: CD138<sup>+</sup> unspecific and SARS-CoV-2 specific plasmablasts  
501 which resemble mature plasma cells. If not indicated otherwise, cell counts per microlitre  
502 blood are shown as single values with median. Statistical differences: Kruskal-Wallis test with  
503 Dunn's post hoc test, significant differences are indicated as \* $P < 0.05$ , \*\* $P < 0.01$ ,  
504 \*\*\*\* $P < 0.0001$

505

506 Figure 3: Antibody secreting cells (ASC) measured in 3-colour-Fluorospot 7 days after the  
507 second vaccination. See figure S3 for representative image. **A** Number of total and SARS-  
508 CoV-2 specific ASCs per  $\mu$ L blood. **B** Spot size distribution. Single points resemble the mean

509 spot size per spot of one donor. Correlation (Pearson) of the number of SARS-Cov-2 specific  
510 ASCs **C** against SARS-CoV-2 specific plasma blasts in flow cytometry and **D** against SARS-CoV-  
511 2 serum IgG. Statistical differences: Kruskal-Wallis test with Dunn's post hoc test, significant  
512 differences are indicated as *\*P<0.05*, *\*\*\*P<0.001*

513

514 Figure 4: SARS-CoV-2 specific memory T cells in patients receiving TNF $\alpha$  blockers show a  
515 delayed activation status. Antigen-reactive T cell enrichment was performed two months  
516 after the second vaccination. **A** Frequencies of spike-reactive CD154+ memory cells within  
517 CD4+ T cells. **B** Percentage of cytokine production within spike-reactive CD154+ memory  
518 cells. **C** Percentage of PD-1 and Ki-67 positive cells within CD154+ memory cells. Each dot  
519 represents one donor, lines indicate mean values. Statistical differences: Kruskal-Wallis test  
520 with Dunn's post hoc test, significant differences are indicated as *\*\*P<0.01*

521

522

**A**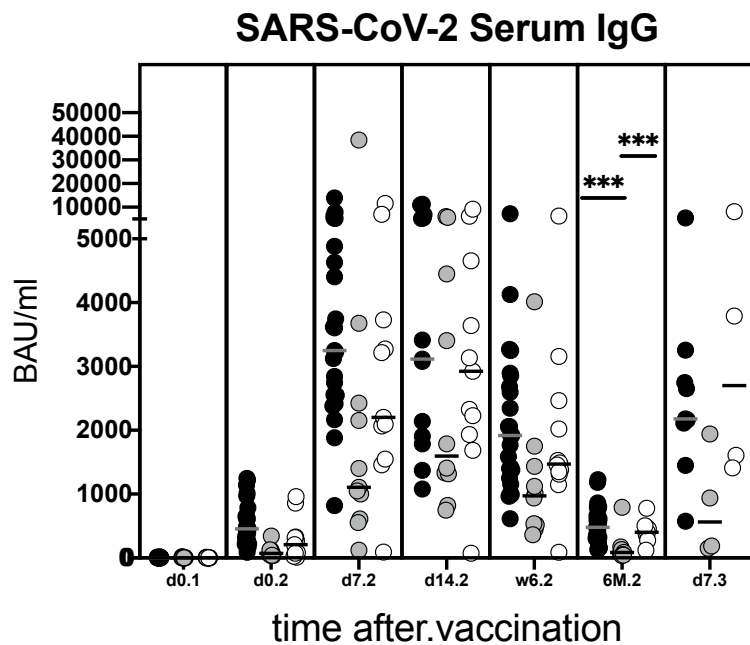**B**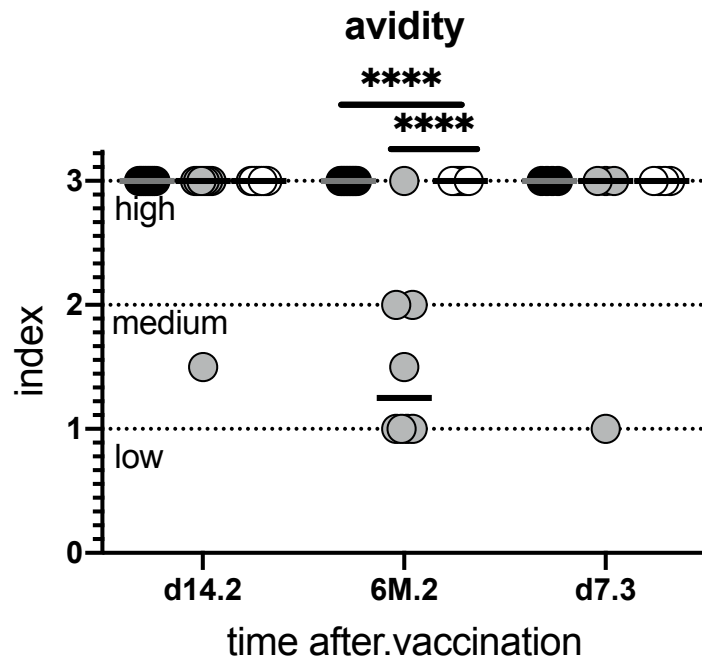**C**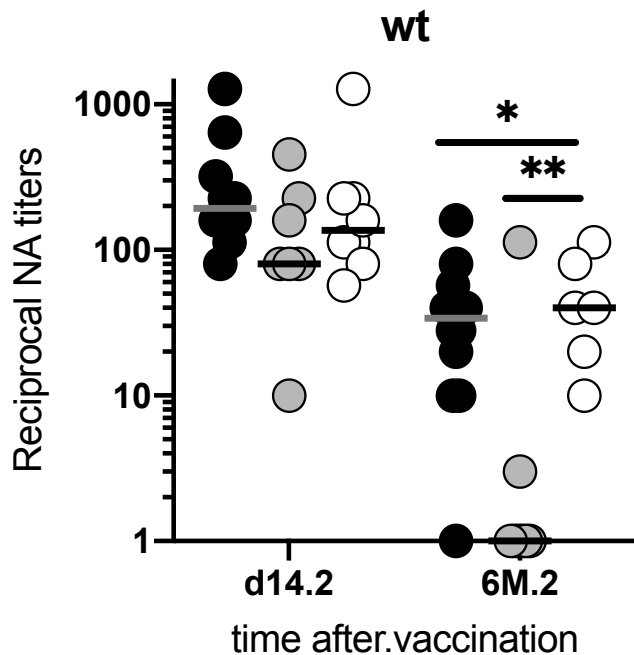**D**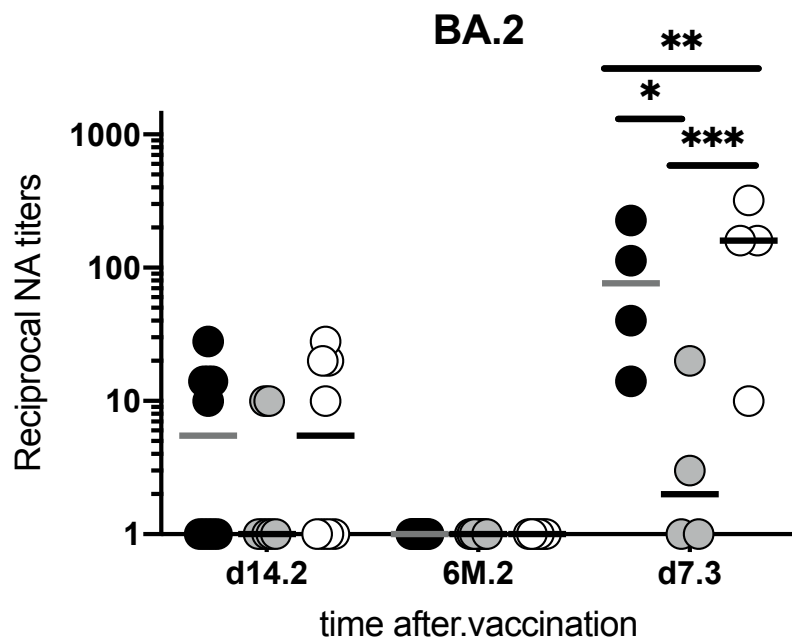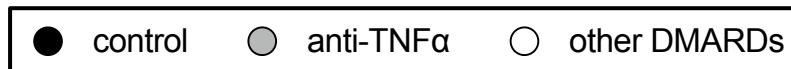

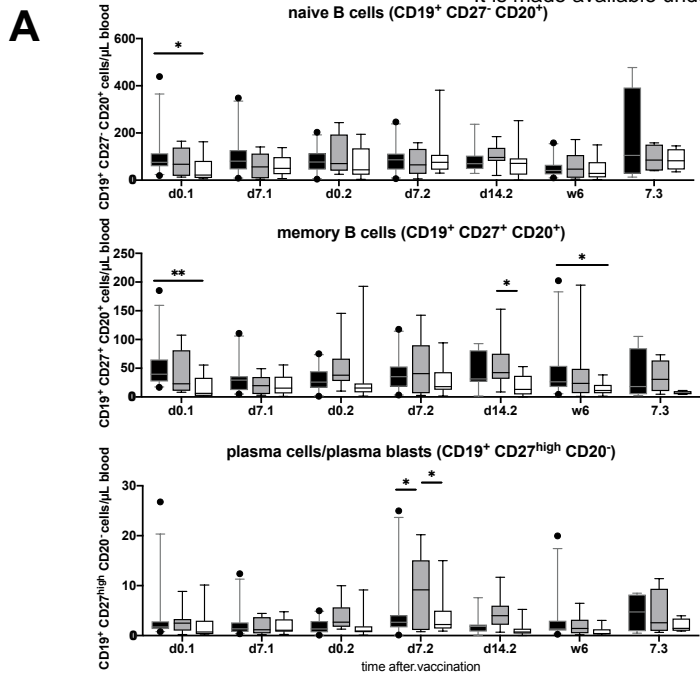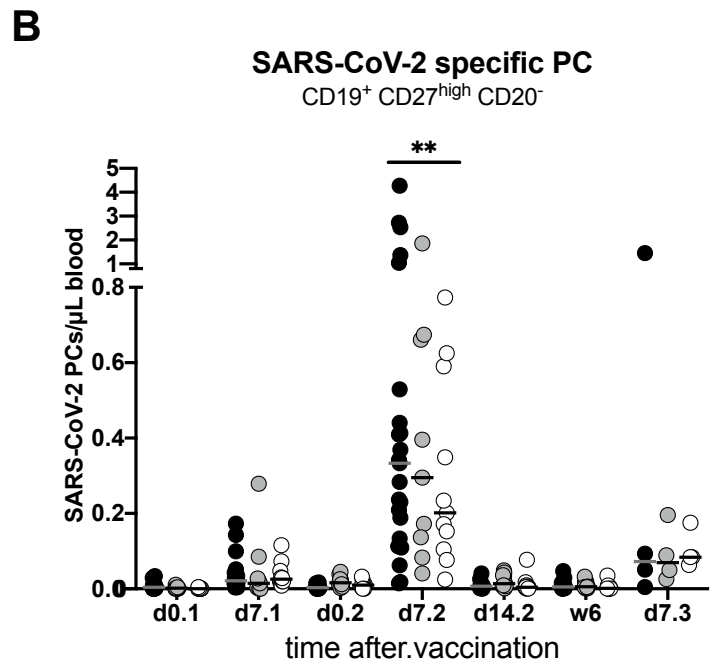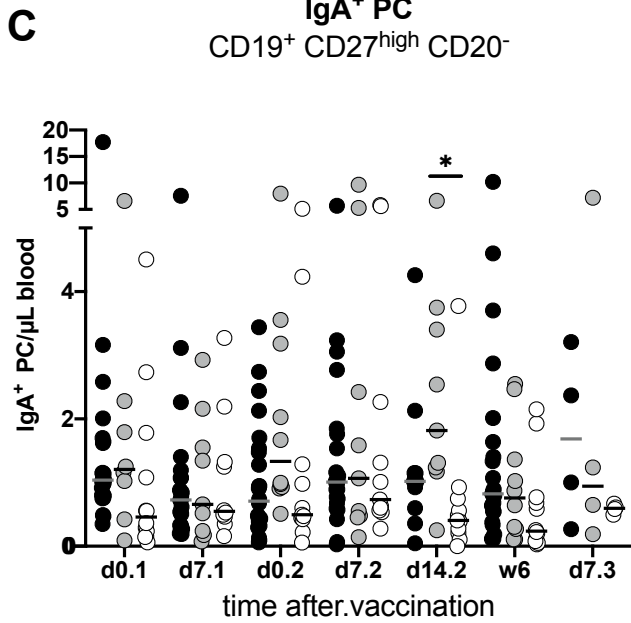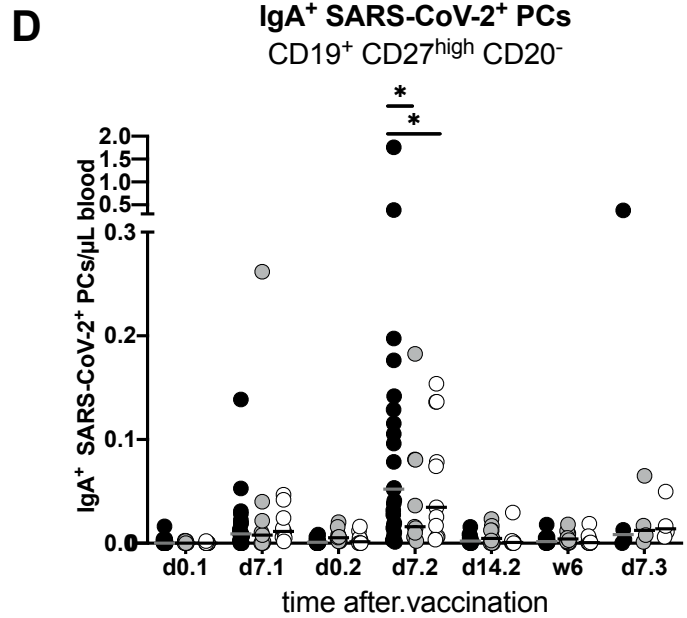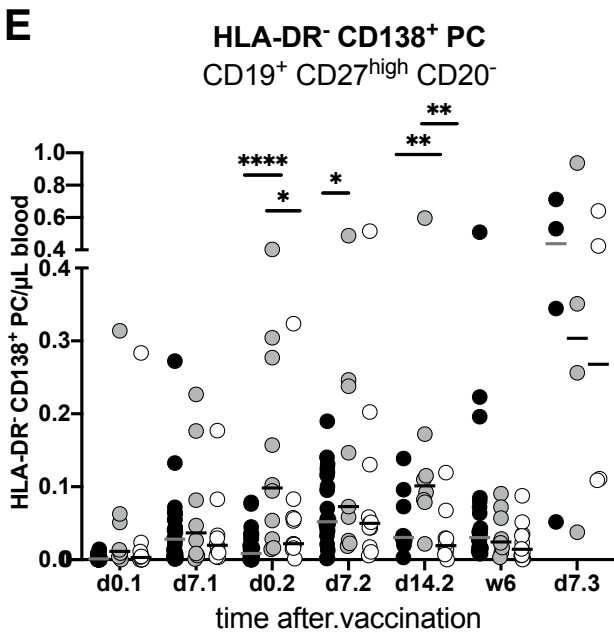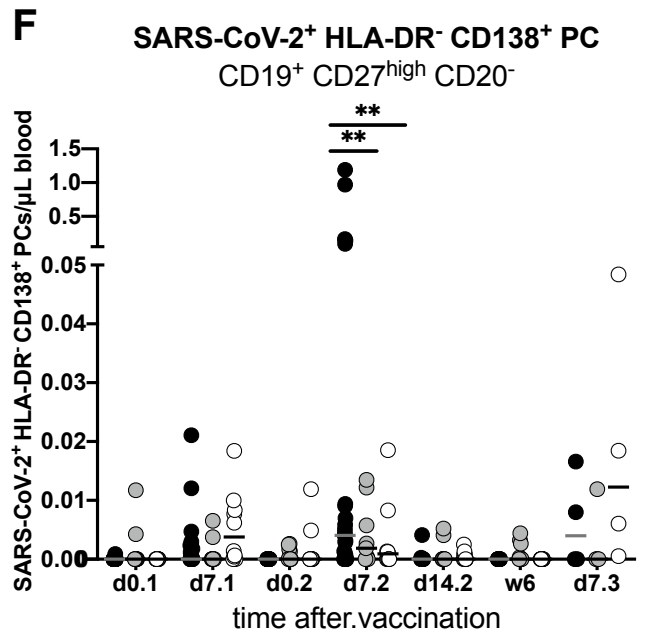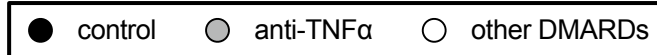

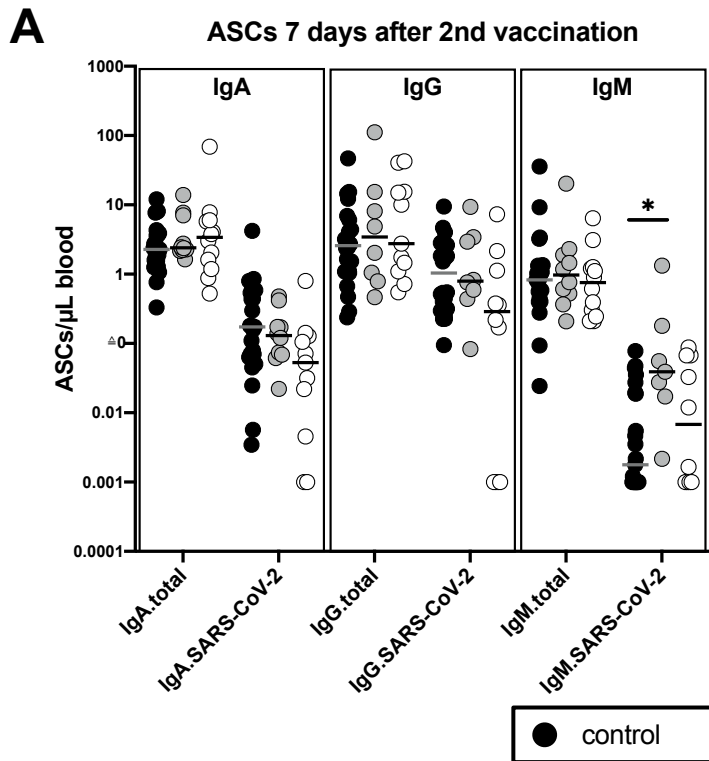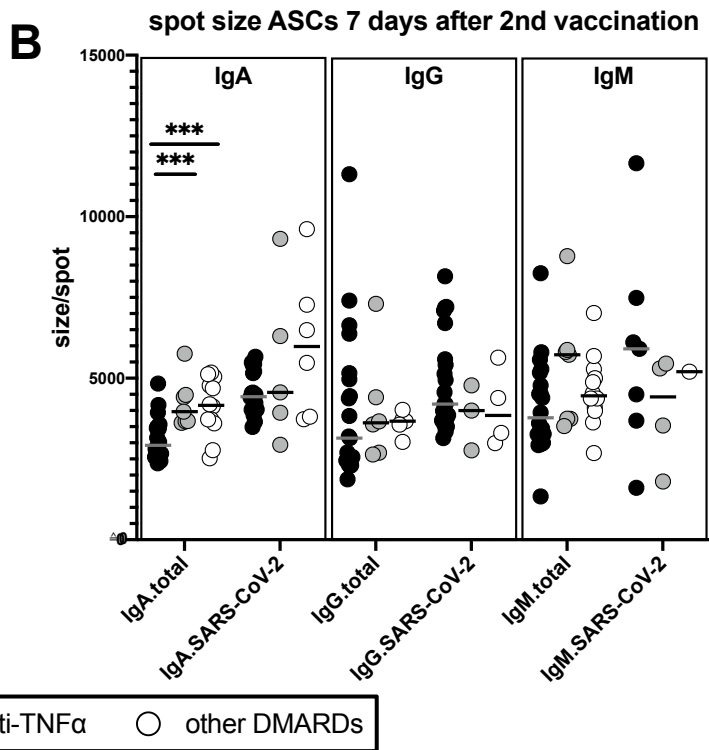

**C** Correlation of SARS-CoV-2 specific ASCs and serum IgG

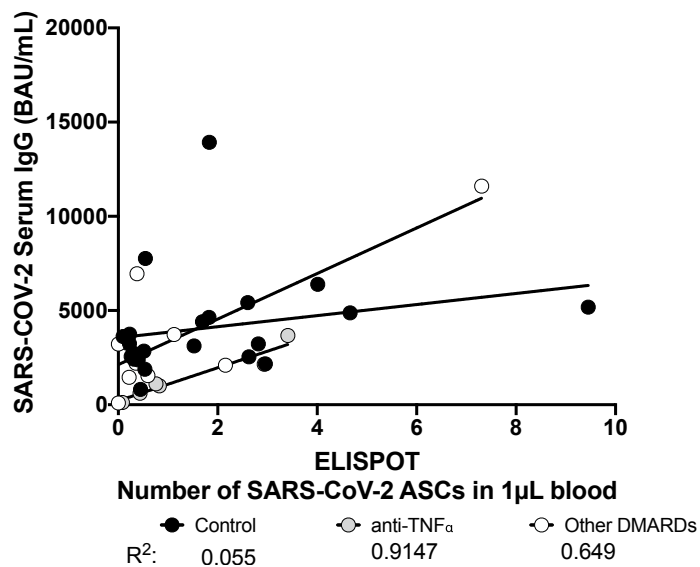

**D** Correlation of SARS-CoV-2 specific ASCs and PC

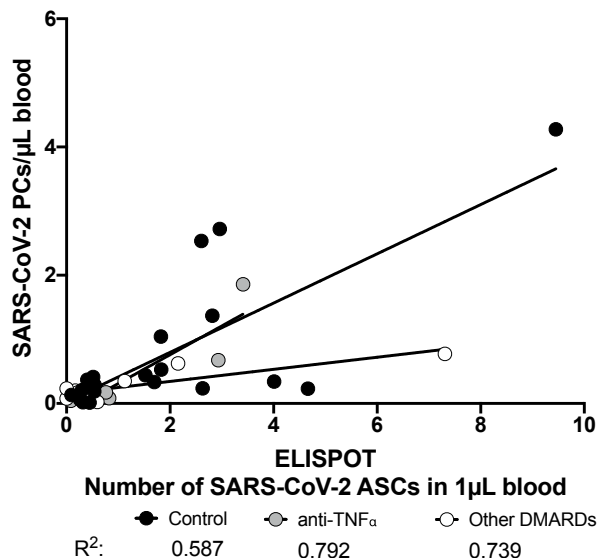

**A**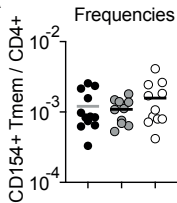**C**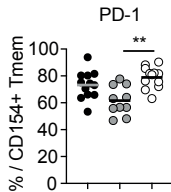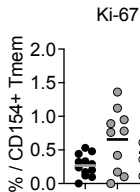

- Control
- anti-TNF $\alpha$
- other DMARDs

**B**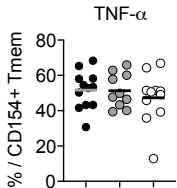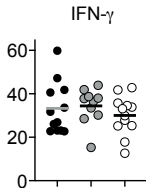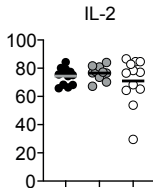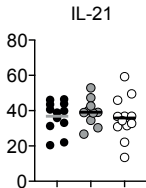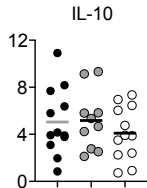

Source: https://medrxiv.org/content/10.1101/2022.07.01.22277143v1.full.pdf
